# Supplementary material
Source: HighWire-hosted journal article supplement (https://www.cmajopen.ca/highwire/filestream/84470/field_highwire_adjunct_files/4/2020-0013-original-submission.pdf)
Supplement: 2020-0013-original-submission.pdf [file 2020-0013-original-submission.pdf]

## Type 2 Diabetes Mellitus and Risk of Community-acquired Pneumonia: A Systematic Review and Meta-analysis of Observational Studies

**Short title:** Type 2 Diabetes and Pneumonia: A Meta-analysis

Vanessa C Brunetti MSc<sup>1,2</sup>, Henok Tadesse Ayele PhD<sup>1,2</sup>, Oriana Hoi Yun Yu MD MSc<sup>2,3</sup>, Pierre Ernst MD<sup>2,4,5</sup>, and Kristian B Filion PhD<sup>1,2,5\*</sup>

1. Department of Epidemiology, Biostatistics, Occupational Health, McGill University, Montreal, Quebec, Canada
2. Center for Clinical Epidemiology, Lady Davis Institute, Jewish General Hospital, Montreal, Quebec, Canada
3. Division of Endocrinology, Jewish General Hospital, McGill University, Montreal, Quebec, Canada
4. Division of Pneumology, Jewish General Hospital, McGill University, Montreal, Quebec, Canada
5. Department of Medicine, McGill University, Montreal, Quebec, Canada

**Word count:** 2491; **Tables:** 2; **Figures:** 2; **Supplemental Tables:** 4; **Supplemental Figures:** 5;

**Key words:** Type 2 diabetes, Community-acquired Pneumonia, Meta-analysis, Epidemiology

### Address for Correspondence:

Kristian B. Filion, Ph.D. FAHA

Associate Professor and William Dawson Scholar

Departments of Medicine and of Epidemiology, Biostatistics, and Occupational Health

McGill University

3755 Côte Ste Catherine, Suite H410.1

Montréal, Québec H3T 1E2 Canada

Phone: (514) 340-8222 x 28394

Fax: (514) 340-7564

Email: [kristian.filion@mcgill.ca](mailto:kristian.filion@mcgill.ca)

Website: <http://www.ladydavis.ca/en/kristianfilion>

Results from this manuscript were presented as a poster presentation at the Society for Epidemiologic Research (SER) 2019 meeting in Minneapolis, MN on June 19<sup>th</sup> 2019.

## CONFLICT OF INTEREST STATEMENT

The authors have no conflicts to declare.

## ACKNOWLEDGEMENTS

We would like to thank Andrea Quaiattini, medical librarian at McGill University, for her help in developing the search strategy. Vanessa Brunetti is supported by the Doctoral Training Scholarship from the *Fonds de recherche du Québec – santé* (FRQ-S; Quebec Foundation for Health Research), the Drug Safety and Effectiveness Training (DSECT) Program Award, funded by the Canadian Institutes of Health Research (CIHR) and the David G. Guthrie Fellowship from the Faculty of Medicine at McGill University. Dr. Ayele is supported by the Postdoctoral Training Scholarship from the FRQ-S. Dr. Yu holds a *Chercheur-boursier clinicien* Junior I salary support award from the FRQ-S. Dr. Filion holds a *Chercheur-boursier* Junior II salary support award from the FRQS and a William Dawson Scholar award from McGill University.

## AUTHOR CONTRIBUTIONS

Dr. Filion conceived the study idea and supervised the study. Ms Brunetti developed the search strategy, performed the statistical analyses, and drafted the manuscript. Both Ms Brunetti and Dr. Tadesse Ayele performed the screening of relevant articles, data extraction, and quality assessment. Drs. Ernst and Yu provided substantive knowledge expertise. All authors were involved in study design, interpretation of data, and critically reviewed the manuscripts for intellectual content. Dr. Filion is the guarantor.

## ABSTRACT

**Background:** Patients with type 2 diabetes mellitus are more likely to suffer from infections. Previous studies on the association between type 2 diabetes and community-acquired pneumonia (CAP) report mixed results, and previous knowledge syntheses did not specifically evaluate the risk of CAP in patients with type 2 diabetes. The purpose of this study was to conduct a systematic review and meta-analysis of observational studies on type 2 diabetes and CAP.

**Methods:** We systematically searched MEDLINE, EMBASE, CINAHL, ProQuest theses and dissertations, Global Health (Ovid), Global Index Medicus of the World Health Organization and Google scholar. We included observational studies published in English or French between January 1<sup>st</sup> 1946 and July 31<sup>st</sup> 2018. Two independent reviewers extracted data and conducted quality assessment of included studies using Robins-I tool. Dersimonian-Laird random-effects models were used to pool estimates.

**Results:** Our search identified 943 articles, of which 11 were included. All studies reported an increased risk of pneumonia in patients with type 2 diabetes; the presence of heterogeneity prevented the meta-analysis of data across study designs ( $I^2$ : 94.4). The pooled relative risk (RR) was 1.67 (95% CI 1.62, 1.72,  $I^2$ : 66.9%) among cohort studies and 1.29 (95% CI 1.15 – 1.44,  $I^2$ : 22.1%) among case-control studies.

There was evidence of publication bias, and studies were of low quality, mainly due to inadequate control of confounding factors.

**Interpretation:** Type 2 diabetes is associated with an increased risk of CAP. Physicians should be aware of this increased risk when managing patients with type 2 diabetes.

## INTRODUCTION

Type 2 diabetes mellitus is a metabolic condition characterized by insulin resistance or insufficient production of insulin, resulting in hyperglycemia<sup>1</sup>. Globally, the rate of type 2 diabetes mellitus is projected to increase from 285 to 439 million people with type 2 diabetes from 2010 to 2030<sup>2</sup>. An estimated 30.3 million Americans have type 2 diabetes, representing more than 9% of the total United States (US) population<sup>3</sup>.

Patients with type 2 diabetes are at greater risk of infections, including urinary tract and genital infections<sup>4</sup>. The hyperglycemic environment in these patients, which is conducive to bacteria growth and proliferation, can lead to decreased T lymphocyte response and decreased neutrophil and macrophage function<sup>5,6</sup>. In addition to having an increased risk of infection, patients with diabetes also exhibit worse infection outcomes than patients without diabetes<sup>4</sup>.

Community-acquired pneumonia (CAP) is a common infection, which often requires hospitalization. In the US, pneumonia is the second leading cause of hospitalization after childbirth. Approximately ten percent of patients hospitalized with a primary diagnosis of pneumonia die in hospital<sup>7</sup>.

Previous observational studies have examined the association between diabetes and the risk of pneumonia<sup>6,8-13</sup>. While the literature generally supports an increased risk<sup>4,8-10,12,13</sup>, previous studies have produced heterogeneous results, and there is a need to better understand potential sources of heterogeneity in this literature. In addition, the literature on the association between type 2 diabetes and CAP has not yet been synthesized. Given the increasing prevalence of type 2 diabetes and the clinical consequences of CAP, it is important to better understand the risk of CAP associated with type 2 diabetes. Our objective was to determine if type 2 diabetes mellitus is associated with an increased risk of CAP via a systematic review and meta-analysis of observational studies.

## METHODS

### Data sources and searches

Our study protocol, which was written following the Preferred Reporting Items for Systematic review and Meta-Analysis Protocols (PRISMA-P) 2015 checklist (e-Table 1)<sup>14</sup>, was registered with PROSPERO (CRD42018116409). The reporting of this knowledge synthesis follow the PRISMA and MOOSE guidelines<sup>15,16</sup>.

We systematically searched Excerpta Medica database (Embase: Ovid), MEDLINE (Ovid), Cumulative Index of Nursing and Allied Health Literature (CINAHL), as well as ProQuest theses and dissertations (EBSCO host) for studies published in English or in French on type 2 diabetes and pneumonia. We included studies published between January 1<sup>st</sup>, 1946 (the start of Medline) and July 31<sup>st</sup>, 2018. The search strategy, which was constructed in consultation with a medical librarian and tailored to each database, is reported in detail in e-Table 2. Briefly, we used MeSH terms for MEDLINE and CINAHL and Emtree terms for Embase for the concepts of type 2 diabetes and CAP. In addition, we searched Global Health (Ovid) as well as Global Index Medicus of the World Health Organization for any relevant grey literature. We also screened the first 10 pages of Google Scholar for additional studies. Finally, we hand-searched references of relevant articles for additional studies.

### Study selection

Studies were included if they fulfilled the following criteria: 1) observational design (cohort or case-control study); 2) study population aged  $\geq 18$  years; 3) reported at least one of the following two exposures: type 2 diabetes or diabetes with type not specified; and 4) reported at least one of the following two outcomes: CAP or unspecified pneumonia (i.e., did not explicitly differentiate between community-acquired and nosocomial [hospital- or ventilator-acquired]). We excluded cross-sectional studies due to

1  
2  
3 their temporal ambiguity. We also excluded letters-to-the-editor, commentaries, editorials, case reports,  
4 case series, reviews and meta-analyses, animal studies, and basic science studies. In addition, we excluded  
5 conference abstracts as they typically have insufficient data to adequately assess study quality and because  
6 their results are often not final. Finally, we excluded studies that evaluated only type 1 diabetes and studies  
7 for which events were restricted to nosocomial pneumonia.  
8  
9  
10  
11  
12  
13

### 14 15 16 17 **Data extraction and quality assessment** 18

19 After removal of duplicates, two independent reviewers (VCB, HTA) screened titles and abstracts  
20 for eligibility, with any article deemed potentially eligible by either reviewer carried forward for full-text  
21 review. Both reviewers conducted full-text review independently, with final inclusion determined by  
22 consensus. Both reviewers independently extracted data using a pilot-tested data extraction form. The  
23 following information was extracted: authors, year and location of study, study design, exposure and  
24 outcome definitions, duration of follow-up, number of participants, baseline patient characteristics (mean  
25 age, sex), primary and secondary study endpoints, number of events by exposure group, crude and adjusted  
26 point estimates (odds ratio [OR], rate ratio [RR], or hazard ratio [HR]) and corresponding 95% confidence  
27 interval (CI), and variables included in statistical adjustment or matching.  
28  
29  
30  
31  
32  
33  
34  
35  
36  
37  
38  
39  
40  
41

42 We used an adapted version of the Risk Of Bias In Non-randomised Studies - of Interventions  
43 (ROBINS-I) tool (adapted for exposure instead of intervention) to assess the quality of included studies.  
44 A predefined set of important confounders was used to assess the potential level of confounding; this set  
45 included age, sex, smoking status, alcohol use, history of asthma and chronic obstructive pulmonary  
46 disorder. Overall study quality was determined by the ROBINS-I domain with the greatest risk of bias.  
47 We included all observational studies meeting inclusion criteria in our study regardless of study quality.  
48  
49  
50  
51  
52  
53  
54  
55  
56  
57  
58  
59  
60

1  
2  
3 Quality assessment was conducted independently by two reviewers (VCB and HTA), with disagreements  
4  
5 resolved by consensus or by a third reviewer (KBF).  
6  
7  
8  
9

## 10 **Data synthesis and analysis**

11  
12 Data were pooled across studies using DerSimonian and Laird random-effects models with inverse  
13  
14 variance weighting<sup>17</sup>. We pooled the estimates from the most adjusted model reported by each study. If a  
15  
16 study reported results from distinct cohorts that were non-overlapping, results from each of these cohorts  
17  
18 were analysed separately. When pooling the results, the HR was converted to a RR using previously  
19  
20 reported methods<sup>18</sup>. As pneumonia is a rare outcome<sup>19</sup>, we assumed that ORs accurately estimated RRs,  
21  
22 and thus ORs and RRs were pooled together. Heterogeneity was assessed quantitatively using the  $I^2$   
23  
24 statistic, and qualitatively by comparing exposure and outcome definitions of the different studies. Sub-  
25  
26 group analyses were conducted by study type (cohort vs case-control), exposure definition (type 2 vs  
27  
28 unspecified diabetes), and outcome definition (community-acquired vs unspecified pneumonia).  
29  
30 Publication bias was assessed via visual inspection of funnel plots<sup>20</sup>. We also conducted the following 2  
31  
32 sensitivity analyses: 1) fixed-effects analysis to examine the impact of our choice of modeling approach;  
33  
34 2) influence analyses to examine the impact of individual studies on the overall measure of association.  
35  
36  
37  
38  
39 All analyses were performed using Stata version 15<sup>21</sup>.  
40  
41  
42  
43  
44  
45  
46  
47  
48  
49  
50  
51  
52  
53  
54  
55  
56  
57  
58  
59  
60

## RESULTS

### Search results

We identified 1083 publications through database searching, with an additional 46 articles identified through other sources (Figure 1). After removal of duplicates, 943 publications underwent title and abstract review. Eleven studies met our inclusion criteria; these studies included a total of 14,397,109 patients.

Characteristics of the included studies are presented in Table 1. Eleven articles<sup>8,9,11,13,22-26</sup> reporting on 11 cohort and 2 case-control studies<sup>10,12</sup> were included. The article by Seminog et al.<sup>13</sup> reported results from 3 distinct cohorts (Linked English Hospital Episodes Statistics [LHES], Oxford Record Linkage Study 1 [ORLS] 1, and ORLS2) that were non-overlapping, and thus results from each of these cohorts were analysed separately but considered collectively when describing study characteristics. Both case-control studies were population-based studies conducted using registry data. All studies were published between 2004 and 2017, and most studies were conducted in Europe<sup>6,8,10-13,22</sup>, with three studies in the US<sup>24-26</sup> and the other in Australia<sup>9</sup>. A total of 6 studies defined exposure as type 2 diabetes specifically<sup>6,9-12,22</sup>, while the remaining 5 studies considered diabetes in general<sup>8,13,24-26</sup>. Exposure and outcome assessment varied between studies (e-Table 3). Most studies adjusted for age, sex, and socioeconomic status in their fully-adjusted models. Adjusted estimates were unavailable for 2 studies<sup>9,24</sup>.



## Quality assessment

The combined risk of bias for all studies was serious, as all studies presented a serious risk of bias in at least one of the ROBINS-I domains (e-Table 4). Three, 4 and 4 studies were respectively at serious, moderate and low risk of selection bias. All studies were either at low<sup>8,10-13,22-24</sup> or moderate<sup>9</sup> risk of information bias. All included studies were at a serious risk of bias for confounding, mainly because of inadequate control of important confounders. For instance, only two of the included studies controlled for a chronic obstructive pulmonary disorder<sup>25,26</sup>, and only 4 controlled for smoking<sup>8,11,25,26</sup> and 4 for asthma<sup>6,25</sup> or other markers of pulmonary function<sup>8,26</sup>. As all studies presented a serious risk of bias, stratified analyses by study quality was not possible.

## Diabetes and pneumonia

All included studies reported an increased risk of pneumonia in patients with diabetes (Table 2). Adjusted estimates ranged from 1.26 (95% CI 1.21, 1.31)<sup>10</sup> to 1.87 (95% CI 1.72, 2.04)<sup>13</sup>. Due to the presence of substantial heterogeneity ( $I^2$ : 94.4%), data were not pooled across designs. When data were pooled by study design, the pooled estimates for the association between diabetes and pneumonia were 1.67 (95% CI 1.62, 1.72;  $I^2$ : 66.9%) for cohort studies and 1.29 (95% CI 1.15, 1.44;  $I^2$ : 22.1%) for case-control studies. In subgroup analyses, the pooled estimate for studies where exposure was restricted to type 2 diabetes was 1.48 (95% CI 1.26, 1.74;  $I^2$ : 97.4%) and 1.70 (95% CI 1.59, 1.82;  $I^2$ : 55.8%) for studies of diabetes in general (e-Figure 1). Estimates also varied with outcome definition; studies of hospitalization for pneumonia had a RR of 1.57 (95% CI 1.32, 1.87;  $I^2$ : 97.8%) and those with any pneumonia diagnosis had a RR of 1.61 (95% CI 1.48, 1.75,  $I^2$ : 73.2%) (e-Figure 2).

In sensitivity analyses, fixed-effects models produced results that were consistent with those of our primary analysis (data not presented; cohort: 1.66, 95% CI 1.65, 1.67,  $I^2$ : 66.9%; case-control studies:

1  
2  
3 1.26, 95% CI 1.22, 1.32,  $I^2$ : 22.1%). Influence analyses with random effects suggested that the study by  
4  
5 Kornum (2008) had the greatest impact on the overall estimate and heterogeneity (e-Figures 3 & 4; overall  
6  
7 RR excluding Kornum: 1.67, 95% CI 1.61, 1.72,  $I^2$ = 64.2%). Asymmetry of our funnel plot revealed some  
8  
9 evidence of publication bias (e-Figure 5).  
10  
11  
12  
13  
14  
15  
16  
17  
18  
19  
20  
21  
22  
23  
24  
25  
26  
27  
28  
29  
30  
31  
32  
33  
34  
35  
36  
37  
38  
39  
40  
41  
42  
43  
44  
45  
46  
47  
48  
49  
50  
51  
52  
53  
54  
55  
56  
57  
58  
59  
60

Confidential

## INTERPRETATION

Our systematic review and meta-analysis was designed to assess the association between type 2 diabetes and CAP. All included studies reported an increased risk of pneumonia in patients with type 2 diabetes. Sub-group analyses by study type revealed that a greater risk was observed among cohort studies than among case-control studies. Estimates also varied with exposure and outcome definitions, with greater risks reported in studies that examined diabetes in general and in studies that examined any pneumonia diagnosis. Quality assessment revealed a low quality of included studies, mainly because of inadequate control of confounding.

The increased risk of CAP in patients with type 2 diabetes should be taken into consideration in clinical practice. Physicians may want to inform patients with type 2 diabetes to take preventative measures. Pneumococcal and influenza vaccination has been suggested as a cost-effective strategy to prevent CAP in patients with type 2 diabetes<sup>27</sup> and is suggested by most guidelines<sup>28,29</sup>.

Our results support the hypothesis that the immunity of patients with type 2 diabetes may be compromised, leading to an increased risk of CAP, although this specific biological mechanism has not been established. The increased risk may be due to the impaired function of neutrophils and monocytes caused by hyperglycemia<sup>27</sup>. Patients with type 2 diabetes may be at greater risk of pneumonia because of increased susceptibility to *Staphylococcus aureus*, gram-negative organisms, and *Mycobacterium tuberculosis*, which may increase their risk of infection by pneumococcal pneumonia<sup>30,31</sup>. The increased susceptibility of patients with type 2 diabetes to these organisms is likely caused by their hyperglycemic environment<sup>32,33,34</sup>, which in turn leads to impaired coagulation<sup>35</sup>, endothelial function<sup>36</sup>, fibrinolytic function<sup>37</sup>, and structural and functional abnormalities<sup>38</sup>, which may make them more susceptible to infections in general. Studies have also shown that there is increased adherence of microorganisms to mucosal and epithelial cells in diabetes<sup>39</sup>. It is also possible that the complications associated with

1  
2  
3 diabetes, such as disordered sleep patterns<sup>40</sup> and impaired lung function<sup>41</sup>, may be involved in the  
4  
5 mechanism behind the increased risk of pneumonia. Patients with type 2 diabetes also seem to have worse  
6  
7 pneumonia outcomes as compared to patients without diabetes<sup>27,42</sup>, as certain microorganisms may  
8  
9 become more virulent in a hyperglycemic environment<sup>39</sup>. As such, attaining glycemic control may  
10  
11 improve outcomes in these patients<sup>38</sup>.  
12  
13  
14

15  
16 A previous meta-analysis on diabetes and the risk of all infections revealed an increased risk of  
17  
18 lower respiratory tract infections in patients with diabetes (cohort: OR: 1.35, 95% CI: 1.28, 1.43, I<sup>2</sup>:  
19  
20 79.4%; case-control: OR: 1.60, 95% CI: 1.35, 1.89, I<sup>2</sup>: 86.7%)<sup>4</sup>. However, this study did not differentiate  
21  
22 between diabetes types nor between nosocomial or community-acquired respiratory infections, and their  
23  
24 meta-analysis contained substantial heterogeneity<sup>4</sup>. To our knowledge, the present study is the first  
25  
26 systematic review and meta-analysis focused on the relationship between type 2 diabetes and CAP.  
27  
28 Although the notion that type 2 diabetes is a risk factor for CAP is well known and accepted in a clinical  
29  
30 setting, the literature on this topic is surprisingly sparse and of low to moderate quality. We found that the  
31  
32 main limitation of included studies was inadequate control for important confounders, which may  
33  
34 substantially bias the results. However, the increased risk of CAP in patients with type 2 diabetes was  
35  
36 consistent across studies. Future research examining the biological mechanism behind the increased risk  
37  
38 of CAP with type 2 diabetes is needed to fully understand this association and to develop appropriate  
39  
40 preventative strategies.  
41  
42  
43  
44  
45

46  
47 This study has several strengths. First, our search strategy, which was developed with an  
48  
49 experienced librarian, allowed us to comprehensively assess the available literature. Second, our study  
50  
51 was conducted according to a pre-specified protocol registered at PROSPERO. Third, it included a  
52  
53 detailed assessment of study quality, and included subgroup and sensitivity analyses to better understand  
54  
55 sources of clinical and statistical heterogeneity in this literature.  
56  
57  
58  
59  
60

1  
2  
3 Our study also has potential limitations. First, we found some evidence of publication bias. Second,  
4 the presence of substantial statistical heterogeneity prevented the meta-analysis of data across all studies.  
5 Stratification by study design reduced this heterogeneity. Some subgroup analyses also had important  
6 heterogeneity (by exposure and outcome definition); subsequent analyses determined that it was largely  
7 driven by one study, the exclusion of which greatly reduced the  $I^2$  statistic. Third, several of the included  
8 studies were of modest quality, and systematic reviews are inherently affected by the limitations of their  
9 included studies. Fourth, although it is typically only used in cohort studies, we applied the ROBINS-I  
10 tool to case-control studies. However, both case-control studies were conducted using administrative data  
11 and thus were part of a well-defined underlying cohort. Our adaptation of the ROBINS-I for exposure  
12 instead of intervention allowed us to use it for these studies.  
13  
14  
15  
16  
17  
18  
19  
20  
21  
22  
23  
24  
25  
26  
27  
28  
29  
30  
31  
32  
33  
34  
35  
36  
37  
38  
39  
40  
41  
42  
43  
44  
45  
46  
47  
48  
49  
50  
51  
52  
53  
54  
55  
56  
57  
58  
59  
60

**CONCLUSIONS**

Our systematic review and meta-analysis demonstrates that patients with type 2 diabetes are at increased risk of CAP. Considering the substantial morbidity and mortality associated with CAP, patients should be informed to seek medical attention promptly if they develop symptoms to facilitate early detection and treatment. As hyperglycemia appears to increase the proliferation of bacteria, physicians and patients should be aware of the importance of attaining glycemic control to prevent resulting infections in this patient population.

Confidential

## REFERENCES

1. Petersen KF, Shulman GI. Etiology of Insulin Resistance. *Am J Med* 2006;119:S10-S6.
2. Chen L, Magliano DJ, Zimmet PZ. The worldwide epidemiology of type 2 diabetes mellitus—present and future perspectives. *Nature Reviews Endocrinology* 2011;8:228.
3. CDC. New CDC report: More than 100 million Americans have diabetes or prediabetes. 1600 Clifton Road Atlanta, GA 30329-4027 USA2018 18/07/2018.
4. Abu-Ashour W, Twells L, Valcour J, et al. The association between diabetes mellitus and incident infections: a systematic review and meta-analysis of observational studies. *BMJ Open Diabetes Research & Care* 2017;5.
5. Peleg AY, Weeraratna T, McCarthy JS, Davis TM. Common infections in diabetes: pathogenesis, management and relationship to glycaemic control. *Diabetes/metabolism research and reviews* 2007;23:3-13.
6. Muller LM, Gorter KJ, Hak E, et al. Increased risk of common infections in patients with type 1 and type 2 diabetes mellitus. *Clinical infectious diseases : an official publication of the Infectious Diseases Society of America* 2005;41:281-8.
7. Fry AM, Shay DK, Holman RC, Curns AT, Anderson LJ. Trends in hospitalizations for pneumonia among persons aged 65 years or older in the United States, 1988-2002. *JAMA* 2005;294:2712-9.
8. Benfield T, Jensen J, Nordestgaard B. Influence of diabetes and hyperglycaemia on infectious disease hospitalisation and outcome. *Diabetologia* 2007;50:549-54.
9. Hamilton EJ, Martin N, Makepeace A, Sillars BA, Davis WA, Davis TM. Incidence and predictors of hospitalization for bacterial infection in community-based patients with type 2 diabetes: the fremantle diabetes study. *PloS one* 2013;8:e60502.
10. Kornum JB, Thomsen RW, Riis A, Lervang H-H, Schønheyder HC, Sørensen HT. Diabetes, glycemic control and risk of hospitalization with pneumonia: a population-based case-control study. *Diabetes care* 2008.
11. Hine J, de Lusignan S, Burleigh D, et al. Association between glycaemic control and common infections in people with type 2 diabetes: a cohort study. *Diabetic Medicine* 2017;34:551-7.
12. Thomsen RW, Hundborg HH, Lervang H-H, Johnsen SP, Schønheyder HC, Sørensen HT. Risk of community-acquired pneumococcal bacteremia in patients with diabetes: a population-based case-control study. *Diabetes care* 2004;27:1143-7.
13. Seminog O, Goldacre M. Risk of pneumonia and pneumococcal disease in people hospitalized with diabetes mellitus: English record-linkage studies. *Diabetic Medicine* 2013;30:1412-9.
14. Moher D, Shamseer L, Clarke M, et al. Preferred reporting items for systematic review and meta-analysis protocols (PRISMA-P) 2015 statement. *Syst Rev* 2015;4:1.
15. Moher D, Liberati A, Tetzlaff J, Altman DG. Preferred Reporting Items for Systematic Reviews and Meta-Analyses: The PRISMA Statement. *Journal of Clinical Epidemiology* 2009;62:1006-12.
16. Stroup DF, Berlin JA, Morton SC, et al. Meta-analysis of observational studies in epidemiology: a proposal for reporting. Meta-analysis Of Observational Studies in Epidemiology (MOOSE) group. *Jama* 2000;283:2008-12.
17. DerSimonian R, Laird N. Meta-analysis in clinical trials. *Control Clin Trials* 1986;7:177-88.
18. Shor E, Roelfs D, Vang ZM. The "Hispanic mortality paradox" revisited: Meta-analysis and meta-regression of life-course differentials in Latin American and Caribbean immigrants' mortality. *Soc Sci Med* 2017;186:20-33.
19. Chalmers J, Campling J, Ellsbury G, Hawkey PM, Madhava H, Slack M. Community-acquired pneumonia in the United Kingdom: a call to action. *Pneumonia* 2017;9:15.
20. Light R, Pillemer D. *Summing up: the science of reviewing research*. 1984. Cambridge, MA: Harvard University Press; 1986.
21. StataCorp. *Stata Statistical Software: Release 15*. College Station, TX: StataCorp LLC; 2017.

22. López-de-Andrés A, de Miguel-Díez J, Jiménez-Trujillo I, et al. Hospitalisation with community-acquired pneumonia among patients with type 2 diabetes: an observational population-based study in Spain from 2004 to 2013. *BMJ open* 2017;7:e013097.
23. Muller L, Gorter K, Hak E, et al. Increased risk of common infections in patients with type 1 and type 2 diabetes mellitus. *Clin Infect Dis* 2005;41:281-8.
24. Ray JJ, Meizoso JP, Allen CJ, et al. Admission hyperglycemia predicts infectious complications after burns. *Journal of Burn Care & Research* 2017;38:85-9.
25. Jackson M. L NKM, Thompson W. W, Shay D. K, Yu O, Hanson C. A, Jackson L. A. The Burden of Community-Acquired Pneumonia in Seniors: Results of a Population-Based Study. *Clinical infectious diseases : an official publication of the Infectious Diseases Society of America* 2004;39:1642-50.
26. O'Meara ES, White M, Siscovick DS, Lyles MF, Kuller LH. Hospitalization for pneumonia in the Cardiovascular Health Study: incidence, mortality, and influence on longer-term survival. *J Am Geriatr Soc* 2005;53:1108-16.
27. Joshi N, Caputo GM, Weitekamp MR, Karchmer AW. Infections in Patients with Diabetes Mellitus. *New England Journal of Medicine* 1999;341:1906-12.
28. Husein NC, A. 2018 Clinical Practice Guidelines: Influenza, Pneumococcal, Hepatitis B and Herpes Zoster Vaccinations. *Canadian Journal of Diabetes* 2018;42:S142-S4.
29. Vaccine Information for Adults : Diabetes Type 1 and 2. U.S. Department of Health & Human Services, 2016.
30. Marrie TJ. Bacteraemic pneumococcal pneumonia: A continuously evolving disease. *Journal of Infection* 1992;24:247-55.
31. Bouter KP, Diepersloot RJ, van Romunde LK, et al. Effect of epidemic influenza on ketoacidosis, pneumonia and death in diabetes mellitus: a hospital register survey of 1976–1979 in The Netherlands. *Diabetes research and clinical practice* 1991;12:61-8.
32. Koziel H, Koziel MJ. Pulmonary complications of diabetes mellitus. *Pneumonia. Infectious disease clinics of North America* 1995;9:65-96.
33. Ahluwalia A, Sood A, Sood A, Lakshmy R, Kapil A, Pandey R. Nasal colonization with *Staphylococcus aureus* in patients with diabetes mellitus. *Diabetic medicine: a journal of the British Diabetic Association* 2000;17:487.
34. Boyko EJ, Lipsky BA, Sandoval R, et al. NIDDM and prevalence of nasal *Staphylococcus aureus* colonization: San Luis Valley diabetes study. *Diabetes Care* 1989;12:189-92.
35. Carr ME. Diabetes mellitus: a hypercoagulable state. *Journal of Diabetes and its Complications* 2001;15:44-54.
36. Williams SB, Goldfine AB, Timimi FK, et al. Acute hyperglycemia attenuates endothelium-dependent vasodilation in humans in vivo. *Circulation* 1998;97:1695-701.
37. Ammar Jr RF, Gutterman DD, Brooks LA, Dellsperger KC. Free radicals mediate endothelial dysfunction of coronary arterioles in diabetes. *Cardiovascular research* 2000;47:595-601.
38. Gupta S, Koirala J, Khardori R, Khardori N. Infections in diabetes mellitus and hyperglycemia. *Infect Dis Clin North Am* 2007;21:617-38, vii.
39. Geerlings SE, Hoepelman AI. Immune dysfunction in patients with diabetes mellitus (DM). *FEMS Immunology & Medical Microbiology* 1999;26:259-65.
40. Incalzi RA, Fuso L, Giordano A, et al. Neuroadrenergic denervation of the lung in type I diabetes mellitus complicated by autonomic neuropathy. *Chest* 2002;121:443-51.
41. Sandler M, Bunn AE, Stewart RI. Cross-section study of pulmonary function in patients with insulin-dependent diabetes mellitus. *American Review of Respiratory Disease* 1987;135:223-9.
42. Fine MJ, Smith MA, Carson CA, et al. Prognosis and outcomes of patients with community-acquired pneumonia: a meta-analysis. *Jama* 1996;275:134-41.



**Table 1: Study characteristics of studies examining the association between type 2 diabetes and the risk of community-acquired pneumonia**

| Author, year          | Country     | Sample size | Mean age (SD)*              | Male (%)†                | Exposure        | Primary Outcome                              | Mean duration of follow-up (years) |
|-----------------------|-------------|-------------|-----------------------------|--------------------------|-----------------|----------------------------------------------|------------------------------------|
| <b>Cohort studies</b> |             |             |                             |                          |                 |                                              |                                    |
| Benfield, 2007        | Denmark     | 10,063      | 67.8/ 60.7 ‡                | NR                       | diabetes        | pneumonia hospitalization                    | 7                                  |
| Hamilton, 2013        | Australia   | 6,450       | 63.6/ 66.1 §                | 48.8/NR ‡                | type 2 diabetes | pneumonia hospitalization                    | 12.06                              |
| Hine, 2017            | UK          | 647,330     | 67.0/ 46.0                  | 49.1                     | type 2 diabetes | pneumonia                                    | 1                                  |
| Jackson, 2004         | USA         | 46,237      | NR                          | 42.0                     | diabetes        | Community-acquired pneumonia hospitalization | 3                                  |
| Lopes de Andres, 2017 | Spain       | 901,136     | 77.08 (10.46)               | 60.1                     | type 2 diabetes | community-acquired pneumonia hospitalization | 9                                  |
| Muller, 2005          | Netherlands | 26,328      | 65.7 (12.7) / 63.1 (13.4) ‡ | 46.1/39.1 ‡              | type 2 diabetes | pneumonia                                    | 1                                  |
| O'Meara, 2005         | USA         | 5888        | 75.0 / 72.6 §               | 42.3                     | diabetes        | pneumonia hospitalization                    | 10.7                               |
| Ray, 2017             | USA         | 411         | 60.7/ 55.8/ 48.5/ 44.9 ¶    | 69.2/ 64.7/ 65.3/ 77.1 ¶ | diabetes        | pneumonia                                    | NR                                 |
| Seminog LHES, 2013    | UK          | 11,220,545  | 64                          | NR                       | diabetes        | pneumonia                                    | 4                                  |
| Seminog ORLS1, 2013   | UK          | 640,549     | 64                          | NR                       | diabetes        | pneumonia                                    | 35                                 |

1  
2  
3  
4  
5  
6  
7  
8  
9  
10  
11  
12  
13  
14  
15  
16  
17  
18  
19  
20  
21  
22  
23  
24  
25  
26  
27  
28  
29  
30  
31  
32  
33  
34  
35  
36  
37  
38  
39  
40  
41  
42  
43  
44  
45  
46  
47

|                             |         |         |                              |      |                    |                                     |    |
|-----------------------------|---------|---------|------------------------------|------|--------------------|-------------------------------------|----|
| Seminog<br>ORLS2,<br>2013   | UK      | 508,965 | 62                           | NR   | diabetes           | pneumonia                           | 3  |
| <b>Case-control studies</b> |         |         |                              |      |                    |                                     |    |
| Kornum,<br>2008             | Denmark | 376,629 | 74 (61-82) / 74<br>(61-82) # | 52.9 | type 2<br>diabetes | pneumonia<br>hospitalization        | NR |
| Thomsen,<br>2004            | Denmark | 6,578   | 67 (18-94) / 67<br>(17-94)** | 47.3 | type 2<br>diabetes | community-<br>acquired<br>pneumonia | 9  |

Abbreviations: NR = not reported, UK = United Kingdom, USA = United States of America, SD = standard deviation

\* Mean (SD) of entire population, unless otherwise specified.

† Entire population, unless otherwise specified

‡: Diabetes/no diabetes

§: Hospitalized/non-hospitalized

| : Median

||: Median: Diabetes/no diabetes

¶: Euglycemic with diabetes / Hyperglycemic with diabetes / Hyperglycemic without diabetes / No diabetes with normal glycaemia

#: Median (interquartile range [IQR]): Cases/controls

\*\* : Median (full range): Cases/controls

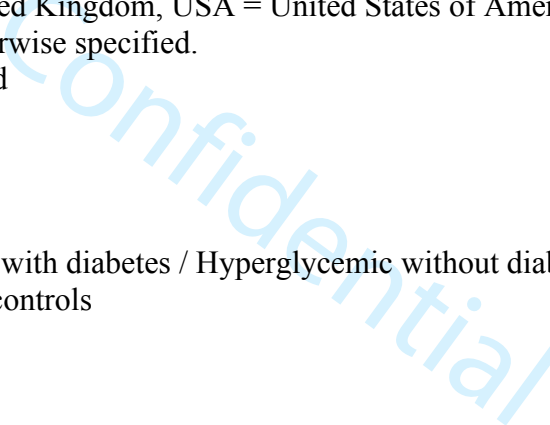

**Table 2: Measures of association of included studies examining the association between type 2 diabetes and the risk of community-acquired pneumonia**

| Author, year          | No. events / No. exposed | No. events / No. unexposed | Measure of association | Unadjusted estimate (95% CI) | Adjusted estimate (95% CI) | Covariates (adjusted for or matched)                                                                                                                                                                                                                                                                  |
|-----------------------|--------------------------|----------------------------|------------------------|------------------------------|----------------------------|-------------------------------------------------------------------------------------------------------------------------------------------------------------------------------------------------------------------------------------------------------------------------------------------------------|
| <b>Cohort studies</b> |                          |                            |                        |                              |                            |                                                                                                                                                                                                                                                                                                       |
| Benfield, 2007        | 90 / 353                 | 1,104 / 9,710              | HR                     | 2.55 (1.86, 3.29)            | 1.75 (1.23, 2.48)          | age, sex, smoking status, socioeconomic status (SES; education, income), cholesterol, triacylglycerol, hypertension, physical activity, lung function                                                                                                                                                 |
| Hamilton, 2013        | 181 / 1,294              | 435 / 5,156                | RR                     | 1.86 (1.55, 2.21)            | -                          | -                                                                                                                                                                                                                                                                                                     |
| Hine, 2017            | 34,278 *                 | 613,052 †                  | OR                     | -                            | 1.43 (1.18, 1.74)          | age, sex, smoking status<br>SES, comorbidities,<br>general practice                                                                                                                                                                                                                                   |
| Jackson, 2004         | -                        | -                          | HR                     | -                            | 1.52 (1.29, 1.78)          | age, sex, smoking, CHF, ischemic heart disease, cancer, dementia, stroke, COPD, asthma, renal disease, use of prednisone or other immunosuppressive medication, no. outpatient visits in the year prior, hospitalization for pneumonia in year prior, home oxygen therapy, receipt of home healthcare |

1  
2  
3  
4  
5  
6  
7  
8  
9  
10  
11  
12  
13  
14  
15  
16  
17  
18  
19  
20  
21  
22  
23  
24  
25  
26  
27  
28  
29  
30  
31  
32  
33  
34  
35  
36  
37  
38  
39  
40  
41  
42  
43  
44  
45  
46  
47

|                       |           |           |    |                   |                   |                                                                                                                                                                                                                                                       |
|-----------------------|-----------|-----------|----|-------------------|-------------------|-------------------------------------------------------------------------------------------------------------------------------------------------------------------------------------------------------------------------------------------------------|
| Lopes de Andres, 2017 | 233,715 * | 677,621 † | RR | -                 | 1.66 (1.65, 1.67) | age, sex                                                                                                                                                                                                                                              |
| Muller, 2005          | -         | -         | OR | 1.31 (1.15, 1.50) | 1.30 (1.11, 1.52) | age, sex, asthma, pulmonary disease (including tuberculosis acute bronchitis, disease, and asthma), insurance type, cardiovascular disease, peripheral neuropathy, neurologic disease                                                                 |
| O'Meara               | -         | -         | RR | -                 | 1.34 (1.05, 1.70) | age, race, education level, smoking, prior vaccination for pneumonia, vaccination for influenza in the year prior, FEV1, FVC, maximal inspiratory pressure, 3MSE score, history of: MI, angina pectoris, CHD, claudication, CHF, CVA, COPD, pneumonia |
| Ray, 2017             | 7 / 47    | 15 / 292  | OR | 3.23 (1.24, 8.38) | -                 | -                                                                                                                                                                                                                                                     |
| Seminog LHES, 2013    | -         | -         | RR | -                 | 1.68 (1.65, 1.71) | age, sex, the time period in single calendar years, SES (region of residence deprivation score)                                                                                                                                                       |
| Seminog ORLS1, 2013   | -         | -         | RR | -                 | 1.87 (1.72, 2.04) | age, sex, the time period in single calendar years, SES (district of residence)                                                                                                                                                                       |

Confidential

|                            |                             |                   |                     |    |                      |                   |                                                                                          |
|----------------------------|-----------------------------|-------------------|---------------------|----|----------------------|-------------------|------------------------------------------------------------------------------------------|
| 1<br>2<br>3<br>4<br>5<br>6 | Seminog<br>ORLS2, 2013      | -                 | -                   | RR | -                    | 1.76 (1.60, 1.92) | age, sex, the time period<br>in single calendar years,<br>SES (district of<br>residence) |
| 7                          | <b>Case-control studies</b> |                   |                     |    |                      |                   |                                                                                          |
| 8<br>9<br>10<br>11<br>12   | Kornum, 2008                | 4,489 /<br>32,975 | 29,750 /<br>343,654 | OR | 1.68 (1.62,<br>1.74) | 1.26 (1.21, 1.31) | age (matched), sex<br>(matched), SES (marital<br>status, degree<br>urbanization)         |
| 13<br>14<br>15<br>16<br>17 | Thomsen, 2004               | 53 / 351          | 545 / 6,227         | OR | 1.9 (1.4, 2.6)       | 1.5 (1.1, 2.0)    | age (matched), sex<br>(matched), Charlson<br>index score, alcohol<br>related disease     |

18 Abbreviations: 3MSE = Modified Mini-Mental State Examination, CHD = coronary heart disease, CHF = congestive heart failure, CI  
19 = confidence interval, COPD = chronic obstructive pulmonary disease, CVA = cerebrovascular accident, FEV1 = forced expiratory  
20 volume in 1 second, FVC = forced vital capacity, MI = myocardial infarction, HR = hazard ratio, OR = odds ratio, RR = risk ratio,

21 \* Total number of exposed patients

22 † Total number of unexposed patients

**FIGURE LEGENDS**

**Figure 1.** Preferred Reporting Items for Systematic Reviews and Meta-Analyses (PRISMA) flow diagram describing systematic search for studies of type 2 diabetes and the risk of community-acquired pneumonia

**Figure 2.** Forest plot of association between type 2 diabetes and risk of community-acquired pneumonia by study design. \*Pooled analyses across study types not presented due to substantial heterogeneity ( $I^2$ : 94.4%)

Confidential

Figure 1

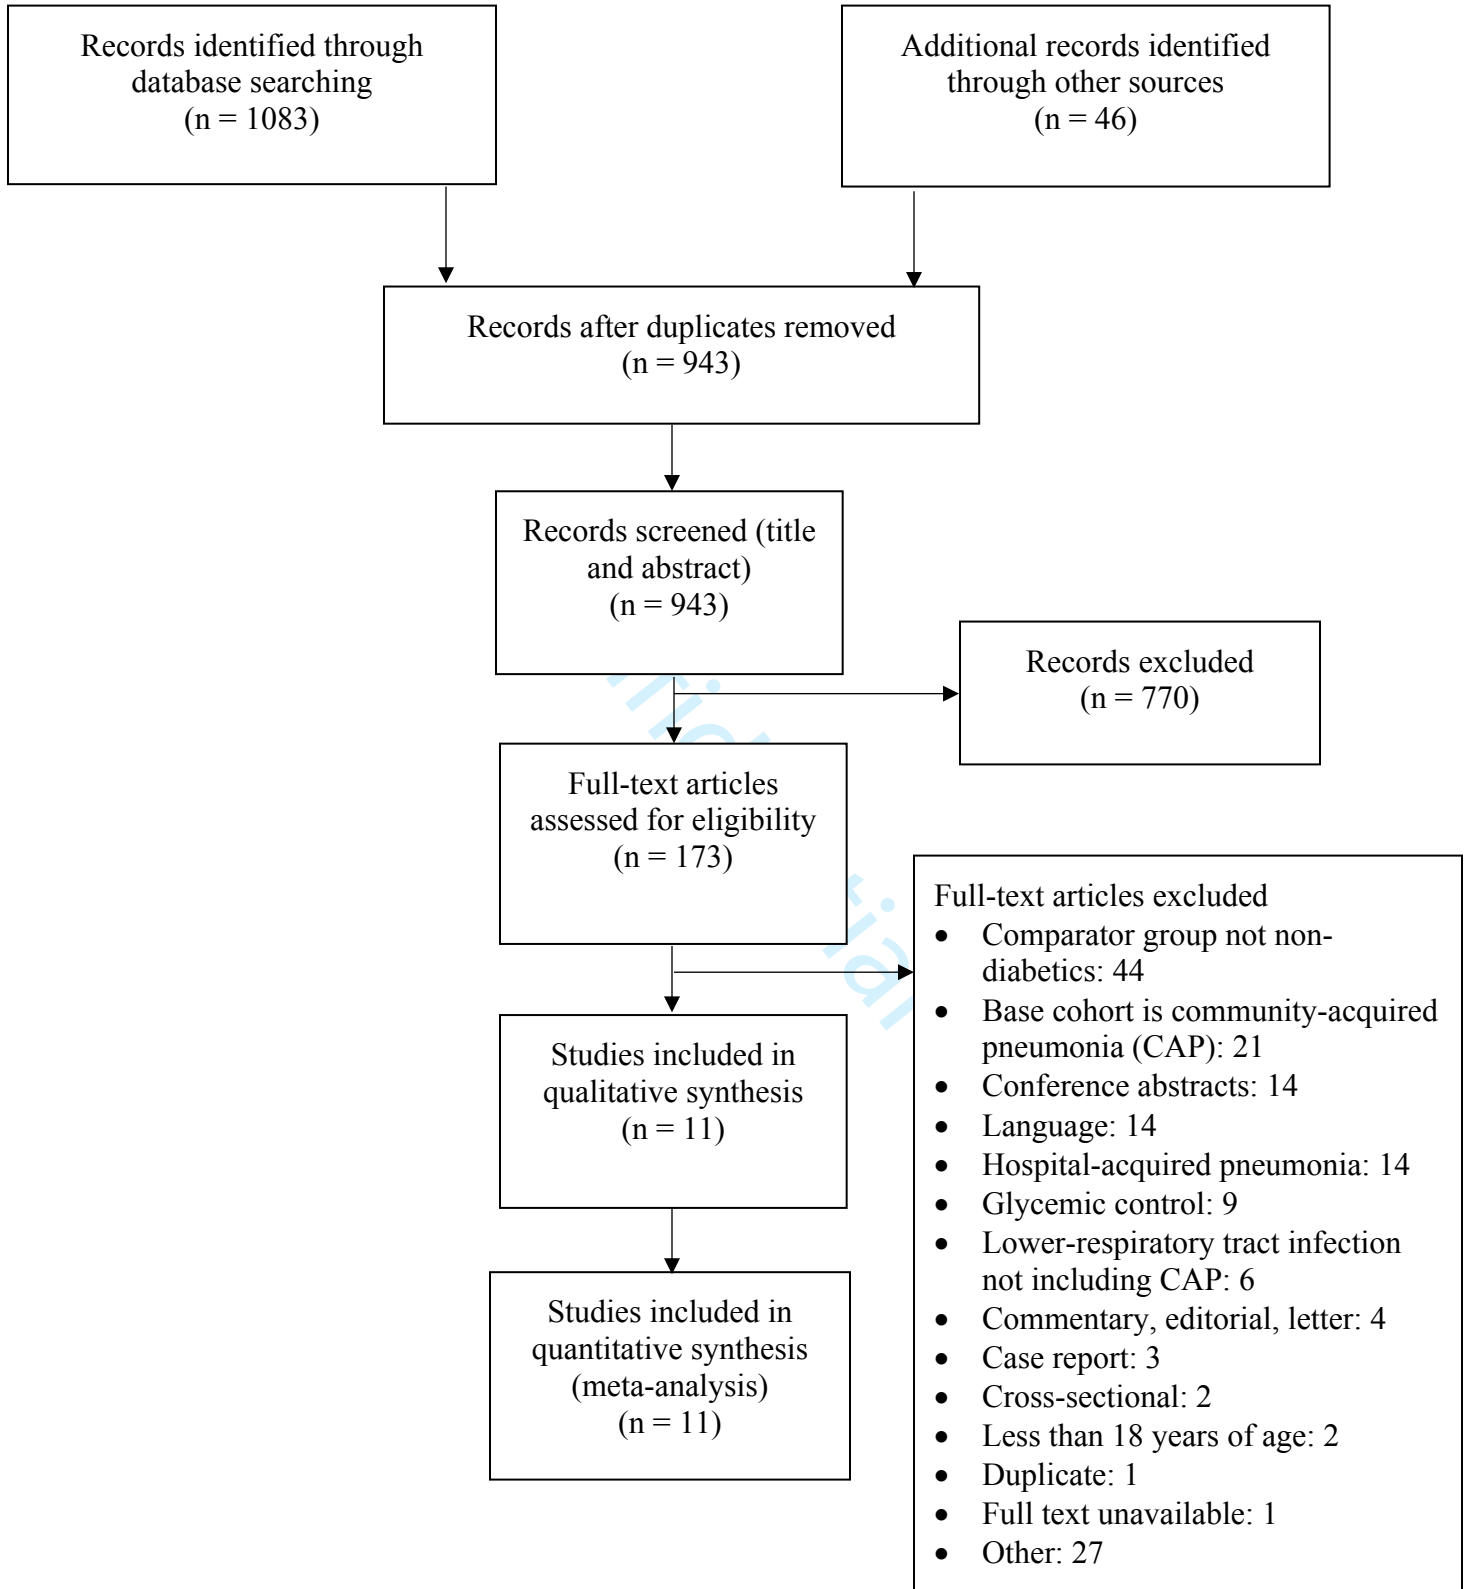

Figure 2

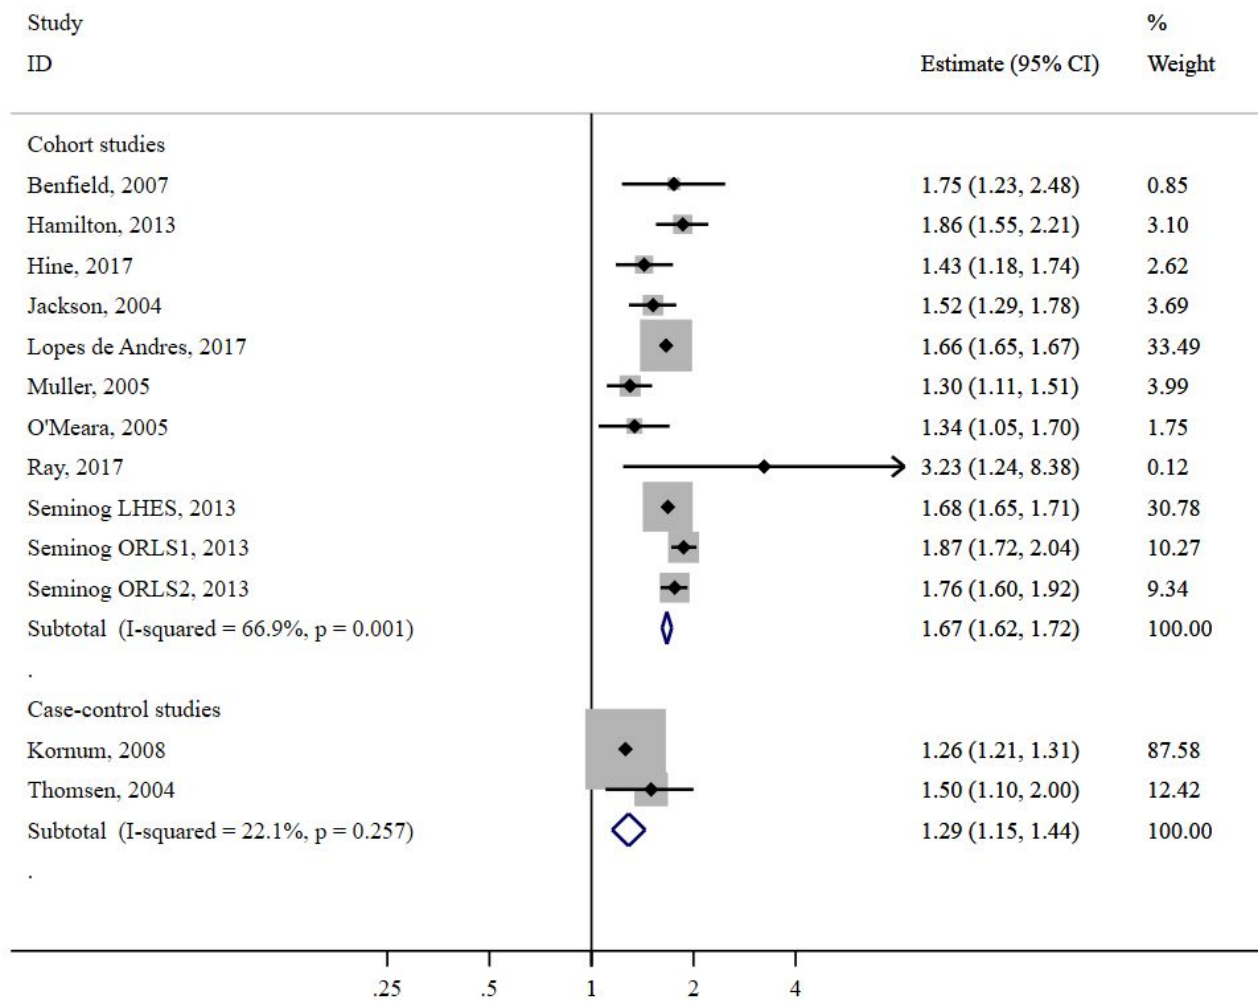



1  
2  
3 **Supplemental material**  
4

5 **Type 2 Diabetes Mellitus and Risk of Community-acquired Pneumonia: A Systematic Review and**  
6 **Meta-analysis of Observational Studies**  
7

8  
9  
10 **e-Table 1:** Preferred Reporting Items for Systematic review and Meta-Analysis Protocols  
11 (PRISMA-P) 2015 checklist  
12

13  
14  
15 **e-Table 2:** Search strategy for observational studies of type 2 diabetes and the risk of community-acquired  
16 pneumonia - MEDLINE  
17

18  
19 **e-Table 3:** Exposure and outcome definitions of included studies of association between type 2 diabetes  
20 and community-acquired pneumonia  
21

22  
23  
24 **e-Table 4:** Quality assessment of studies examining the association between type 2 diabetes and risk of  
25 community-acquired pneumonia  
26

27  
28  
29 **e-Figure 1:** Forest plot of association between type 2 diabetes and risk of community-acquired pneumonia  
30 by exposure definition  
31

32  
33  
34 **e-Figure 2:** Forest plot of association between type 2 diabetes and risk of community-acquired pneumonia  
35 by outcome definition  
36

37  
38 **e-Figure 3:** Influence analysis  
39

40  
41  
42 **e-Figure 4:** Forest plot of association between type 2 diabetes and risk of community-acquired pneumonia  
43 excluding study by Kornum et al. (2008)  
44

45  
46  
47 **e-Figure 5:** Funnel plot for assessment of publication bias of included studies on type 2 diabetes  
48 and community-acquired pneumonia  
49

1  
2  
3  
4  
5  
6  
7  
8  
9  
10  
11  
12  
13  
14  
15  
16  
17  
18  
19  
20  
21  
22  
23  
24  
25  
26  
27  
28  
29  
30  
31  
32  
33  
34  
35  
36  
37  
38  
39  
40  
41  
42  
43  
44  
45  
46  
47

**e-Table 1:** Preferred Reporting Items for Systematic review and Meta-Analysis Protocols (PRISMA-P) 2015 checklist

| Section/topic             | #  | Checklist item                                                                                                                                                                                                                                                                                              | Reported on page # |
|---------------------------|----|-------------------------------------------------------------------------------------------------------------------------------------------------------------------------------------------------------------------------------------------------------------------------------------------------------------|--------------------|
| <b>TITLE</b>              |    |                                                                                                                                                                                                                                                                                                             |                    |
| Title                     | 1  | Identify the report as a systematic review, meta-analysis, or both.                                                                                                                                                                                                                                         | 1                  |
| <b>ABSTRACT</b>           |    |                                                                                                                                                                                                                                                                                                             |                    |
| Structured summary        | 2  | Provide a structured summary including, as applicable: background; objectives; data sources; study eligibility criteria, participants, and interventions; study appraisal and synthesis methods; results; limitations; conclusions and implications of key findings; systematic review registration number. | 2                  |
| <b>INTRODUCTION</b>       |    |                                                                                                                                                                                                                                                                                                             |                    |
| Rationale                 | 3  | Describe the rationale for the review in the context of what is already known.                                                                                                                                                                                                                              | 3                  |
| Objectives                | 4  | Provide an explicit statement of questions being addressed with reference to participants, interventions, comparisons, outcomes, and study design (PICOS).                                                                                                                                                  | 3                  |
| <b>METHODS</b>            |    |                                                                                                                                                                                                                                                                                                             |                    |
| Protocol and registration | 5  | Indicate if a review protocol exists, if and where it can be accessed (e.g., Web address), and, if available, provide registration information including registration number.                                                                                                                               | 4                  |
| Eligibility criteria      | 6  | Specify study characteristics (e.g., PICOS, length of follow-up) and report characteristics (e.g., years considered, language, publication status) used as criteria for eligibility, giving rationale.                                                                                                      | 4-5                |
| Information sources       | 7  | Describe all information sources (e.g., databases with dates of coverage, contact with study authors to identify additional studies) in the search and date last searched.                                                                                                                                  | 4                  |
| Search                    | 8  | Present full electronic search strategy for at least one database, including any limits used, such that it could be repeated.                                                                                                                                                                               | e-Table 1          |
| Study selection           | 9  | State the process for selecting studies (i.e., screening, eligibility, included in systematic review, and, if applicable, included in the meta-analysis).                                                                                                                                                   | 4-5                |
| Data collection process   | 10 | Describe method of data extraction from reports (e.g., piloted forms, independently, in duplicate) and any processes for obtaining and confirming data from investigators.                                                                                                                                  | 5                  |
| Data items                | 11 | List and define all variables for which data were sought (e.g., PICOS, funding sources) and any assumptions and simplifications made.                                                                                                                                                                       | 5                  |

|                                    |    |                                                                                                                                                                                                                        |                                                           |
|------------------------------------|----|------------------------------------------------------------------------------------------------------------------------------------------------------------------------------------------------------------------------|-----------------------------------------------------------|
| Risk of bias in individual studies | 12 | Describe methods used for assessing risk of bias of individual studies (including specification of whether this was done at the study or outcome level), and how this information is to be used in any data synthesis. | 5-6                                                       |
| Summary measures                   | 13 | State the principal summary measures (e.g., risk ratio, difference in means).                                                                                                                                          | 5                                                         |
| Synthesis of results               | 14 | Describe the methods of handling data and combining results of studies, if done, including measures of consistency (e.g., $I^2$ ) for each meta-analysis.                                                              | 6                                                         |
| Section/topic                      | #  | Checklist item                                                                                                                                                                                                         | Reported on page #                                        |
| Risk of bias across studies        | 15 | Specify any assessment of risk of bias that may affect the cumulative evidence (e.g., publication bias, selective reporting within studies).                                                                           | 5-6                                                       |
| Additional analyses                | 16 | Describe methods of additional analyses (e.g., sensitivity or subgroup analyses, meta-regression), if done, indicating which were pre-specified.                                                                       | 6                                                         |
| <b>RESULTS</b>                     |    |                                                                                                                                                                                                                        |                                                           |
| Study selection                    | 17 | Give numbers of studies screened, assessed for eligibility, and included in the review, with reasons for exclusions at each stage, ideally with a flow diagram.                                                        | 7<br>Figure 1                                             |
| Study characteristics              | 18 | For each study, present characteristics for which data were extracted (e.g., study size, PICOS, follow-up period) and provide the citations.                                                                           | 7<br>Table 1                                              |
| Risk of bias within studies        | 19 | Present data on risk of bias of each study and, if available, any outcome level assessment (see item 12).                                                                                                              | 8<br>e-Table 3                                            |
| Results of individual studies      | 20 | For all outcomes considered (benefits or harms), present, for each study: (a) simple summary data for each intervention group (b) effect estimates and confidence intervals, ideally with a forest plot.               | 8-9<br>Table 2<br>Figure 2                                |
| Synthesis of results               | 21 | Present results of each meta-analysis done, including confidence intervals and measures of consistency.                                                                                                                | 8-9<br>Figure 2<br>e-Figure 1<br>e-Figure 2<br>e-Figure 3 |
| Risk of bias across studies        | 22 | Present results of any assessment of risk of bias across studies (see Item 15).                                                                                                                                        | 8<br>e-Table 3                                            |

1  
2  
3  
4  
5  
6  
7  
8  
9  
10  
11  
12  
13  
14  
15  
16  
17  
18  
19  
20  
21  
22  
23  
24  
25  
26  
27  
28  
29  
30  
31  
32  
33  
34  
35  
36  
37  
38  
39  
40  
41  
42  
43  
44  
45  
46  
47

|                     |    |                                                                                                                                                                                      |                                                             |
|---------------------|----|--------------------------------------------------------------------------------------------------------------------------------------------------------------------------------------|-------------------------------------------------------------|
|                     |    |                                                                                                                                                                                      | e-Figure-5                                                  |
| Additional analysis | 23 | Give results of additional analyses, if done (e.g., sensitivity or subgroup analyses, meta-regression [see Item 16]).                                                                | 8-9<br>e-Figure 1<br>e-Figure 2<br>e-Figure 3<br>e-Figure 4 |
| <b>DISCUSSION</b>   |    |                                                                                                                                                                                      |                                                             |
| Summary of evidence | 24 | Summarize the main findings including the strength of evidence for each main outcome; consider their relevance to key groups (e.g., healthcare providers, users, and policy makers). | 10                                                          |
| Limitations         | 25 | Discuss limitations at study and outcome level (e.g., risk of bias), and at review-level (e.g., incomplete retrieval of identified research, reporting bias).                        | 12                                                          |
| Conclusions         | 26 | Provide a general interpretation of the results in the context of other evidence, and implications for future research.                                                              | 13                                                          |
| <b>FUNDING</b>      |    |                                                                                                                                                                                      |                                                             |
| Funding             | 27 | Describe sources of funding for the systematic review and other support (e.g., supply of data); role of funders for the systematic review.                                           | 14                                                          |

**e-Table 2: Search strategy for observational studies of type 2 diabetes and the risk of community-acquired pneumonia - MEDLINE**

| Table 1: search strategy in MEDLINE |                                                                         |
|-------------------------------------|-------------------------------------------------------------------------|
| Search number                       | Search terms                                                            |
| 1                                   | exp Diabetes mellitus, Type 2/                                          |
| 2                                   | type 2 diabet*.mp.                                                      |
| 3                                   | type two diabet*.mp.                                                    |
| 4                                   | insulin resistance/                                                     |
| 5                                   | insulin resist*.mp.                                                     |
| 6                                   | glyc?emic control*.mp.                                                  |
| 7                                   | non insulin dependent diabet*.mp                                        |
| 8                                   | t2dm.ti.                                                                |
| 9                                   | t2dm.ab.                                                                |
| 10                                  | t2dm.kw.                                                                |
| 11                                  | hypoglycemia/                                                           |
| 12                                  | hypoglyc?emia.mp.                                                       |
| 13                                  | hyperglycemia/                                                          |
| 14                                  | hyperglyc?emia.mp.                                                      |
| 15                                  | exp PNEUMONIA/                                                          |
| 16                                  | community acquired pneumonia.mp.                                        |
| 17                                  | respiratory tract infections/                                           |
| 18                                  | Community-Acquired Infections/                                          |
| 19                                  | 1 or 2 or 3 or 4 or 5 or 6 or 7 or 8 or 9 or 10 or 11 or 12 or 13 or 14 |
| 20                                  | 15 or 16 or 17 or 18                                                    |
| 21                                  | 19 and 20                                                               |

1  
2  
3  
4  
5  
6  
7  
8  
9  
10  
11  
12  
13  
14  
15  
16  
17  
18  
19  
20  
21  
22  
23  
24  
25  
26  
27  
28  
29  
30  
31  
32  
33  
34  
35  
36  
37  
38  
39  
40  
41  
42  
43  
44  
45  
46  
47

**e-Table 3: Exposure and outcome definitions of included studies of association between type 2 diabetes and community-acquired pneumonia**

| Author, year          | Exposure        | Exposure definition                                                                        | Primary Outcome                              | Outcome definition                                                                                                                                                                                                 |
|-----------------------|-----------------|--------------------------------------------------------------------------------------------|----------------------------------------------|--------------------------------------------------------------------------------------------------------------------------------------------------------------------------------------------------------------------|
| <b>Cohort studies</b> |                 |                                                                                            |                                              |                                                                                                                                                                                                                    |
| Benfield, 2007        | Diabetes        | Self-reported                                                                              | Pneumonia hospitalization                    | ICD-8 codes: 480 – 486<br>ICD-10 codes : A48.1, J12 – J18                                                                                                                                                          |
| Hamilton, 2013        | Type 2 diabetes | Fasting plasma glucose (>7.8 mmol/l until 1999 and >7.0 mmol/l thereafter) urine samples   | Pneumonia hospitalization                    | ICD-9-CM code :480.1, 480.2 480.8, 480.9, 481, 482.0–.9, 483.0, 485, 486<br>ICD-10 codes: J12.1, J12.2, J12.8, J12.9, J13, J14, J15.0, J15.1, J15.3, J15.4, J15.5, J15.6, J15.7, J15.8, J15.9, J18.0, J18.8, J18.9 |
| Hine, 2017            | Type 2 diabetes | Diagnostic, biochemical and prescription data entered before January 1 2014 (cohort entry) | Pneumonia                                    | read code H20-28                                                                                                                                                                                                   |
| Jackson, 2004         | Diabetes        | Any inclusion in the Group Health Cooperative diabetes registry                            | Community-acquired pneumonia hospitalization | ICD-9-CM codes: 480 – 487.0, 038.0, 038.2, 041.0, 041.2, 320.1                                                                                                                                                     |
| Lopes de Andres, 2017 | Type 2 diabetes | ICD-9-CM codes: 250.x0, 250.x2                                                             | Community-acquired pneumonia hospitalization | ICD-9-CM codes: 480–488, 507.0– 507.8                                                                                                                                                                              |
| Muller, 2005          | Type 2 diabetes | ICPC code DM1 (T90.1) or DM2 (T90.2)                                                       | Pneumonia                                    | pneumonia (R81)                                                                                                                                                                                                    |

|                             |                 |                                                                                                                                  |                              |                                                                                                                                      |
|-----------------------------|-----------------|----------------------------------------------------------------------------------------------------------------------------------|------------------------------|--------------------------------------------------------------------------------------------------------------------------------------|
| O'Meara, 2005               | Diabetes        | Diabetes mellitus at baseline from fasting plasma glucose of at least 126mg/dL or the use of insulin or oral hypoglycemic agents | Pneumonia hospitalization    | ICD-9-CM codes: 481, 482, 486                                                                                                        |
| Ray, 2017                   | Diabetes        | The presence of DM in clinical notes                                                                                             | Pneumonia                    | medical record review of culture results                                                                                             |
| Seminog LHES, 2013          | Diabetes        | ICD-7 code: 260,<br>ICD-8 code: 250<br>ICD-9 code: 250<br>ICD-10 codes: E10–E14                                                  | Pneumonia                    | ICD-10 codes J13, pneumonia specified as <i>S. pneumoniae</i> ; A40.3, septicaemia attributable to <i>S. pneumoniae</i> ; and G00.1, |
| Seminog ORLS1, 2013         | Diabetes        | Idem                                                                                                                             | Pneumonia                    | Idem                                                                                                                                 |
| Seminog ORLS2, 2013         | Diabetes        | Idem                                                                                                                             | Pneumonia                    | Idem                                                                                                                                 |
| <b>Case-control studies</b> |                 |                                                                                                                                  |                              |                                                                                                                                      |
| Kornum, 2008                | Type 2 diabetes | ICD-8 codes: 249– 250<br>ICD-10 codes: E10– E14 ,<br>O24 (diabetes in pregnancy except for O24.4                                 | Pneumonia hospitalization    | ICD-10 codes: J12.x – J18.x<br>ICD-8 codes: not mentioned                                                                            |
| Thomsen, 2004               | Type-2 diabetes | Previous hospitalization with diabetes or earlier prescriptions for insulin or an oral antidiabetic drug                         | Community-acquired pneumonia | Patients older than 15 years with a first hospitalization for community-acquired pneumococcal bacteremia                             |

1  
2  
3  
4  
5  
6  
7  
8  
9  
10  
11  
12  
13  
14  
15  
16  
17  
18  
19  
20  
21  
22  
23  
24  
25  
26  
27  
28  
29  
30  
31  
32  
33  
34  
35  
36  
37  
38  
39  
40  
41  
42  
43  
44  
45  
46  
47

**e-Table 4: Quality assessment of studies examining the association between type 2 diabetes and risk of community-acquired pneumonia**

| Study                | Outcome                                      | Confounding | Selection of participants into the study | Classification of interventions | Deviations from intended intervention | Missing data | Measurement of outcomes | Reported result | Overall |
|----------------------|----------------------------------------------|-------------|------------------------------------------|---------------------------------|---------------------------------------|--------------|-------------------------|-----------------|---------|
| <b>Cohort study</b>  |                                              |             |                                          |                                 |                                       |              |                         |                 |         |
| Benfield et.al. 2007 | Pneumonia related death                      | Serious     | Moderate                                 | Low                             | Low                                   | Low          | Serious                 | Serious         | Serious |
| Hamilton et.al. 2013 | Pneumonia                                    | Serious     | Serious                                  | Moderate                        | Low                                   | Low          | Serious                 | Moderate        | Serious |
| Hine et.al. 2016     | Pneumonia                                    | Serious     | Moderate                                 | Low                             | Low                                   | Moderate     | Serious                 | Serious         | Serious |
| Jackson et. al. 2004 | Community-acquired pneumonia hospitalization | Serious     | Low                                      | Low                             | Serious                               | Moderate     | Moderate                | Moderate        | Serious |
| Lopes-de-Andres      | Community-acquired pneumonia hospitalization | Serious     | Low                                      | Low                             | Low                                   | Moderate     | Low                     | Moderate        | Serious |
| Muller et.al. 2005   | Infections including Pneumonia               | Serious     | Serious                                  | Low                             | Serious                               | Low          | Serious                 | Serious         | Serious |
| O’Meara et. Al, 2005 | Pneumonia hospitalization                    | Serious     | Low                                      | Serious                         | Low                                   | Low          | Moderate                | Moderate        | Serious |
| Ray et.al. 2017      | Pneumonia                                    | Serious     | Moderate                                 | Low                             | Serious                               | Serious      | Serious                 | Serious         | Serious |
| Seminog              | Pneumonia                                    | Serious     | Moderate                                 | Low                             | Low                                   | Low          | Serious                 | Moderate        | Serious |



|    |                           |                 |         |         |     |     |         |          |                |  |
|----|---------------------------|-----------------|---------|---------|-----|-----|---------|----------|----------------|--|
| 1  | et.al                     |                 |         |         |     |     |         |          |                |  |
| 2  | 2013                      |                 |         |         |     |     |         |          |                |  |
| 3  | <b>Case-control study</b> |                 |         |         |     |     |         |          |                |  |
| 4  | Kornum                    | Pneumonia       | Serious | Low     | Low | Low | Low     | Moderate | Serious        |  |
| 5  | et.al.                    | Hospitalization |         |         |     |     |         |          |                |  |
| 6  | 2008                      |                 |         |         |     |     |         |          |                |  |
| 7  | Thomsen                   | Hospitalization | Serious | Serious | Low | Low | Serious | Serious  | Serious        |  |
| 8  | et.al                     | for CAP         |         |         |     |     |         |          |                |  |
| 9  | 2004                      |                 |         |         |     |     |         |          |                |  |
| 10 | <b>Overall</b>            |                 |         |         |     |     |         |          | <b>Serious</b> |  |

Confidential

1  
2  
3  
4  
5  
6  
7  
8  
9  
10  
11  
12  
13  
14  
15  
16  
17  
18  
19  
20  
21  
22  
23  
24  
25  
26  
27  
28  
29  
30  
31  
32  
33  
34  
35  
36  
37  
38  
39  
40  
41  
42  
43  
44  
45  
46  
47

**e-Figure 1: Forest plot of association between type 2 diabetes and risk of community-acquired pneumonia by exposure definition**

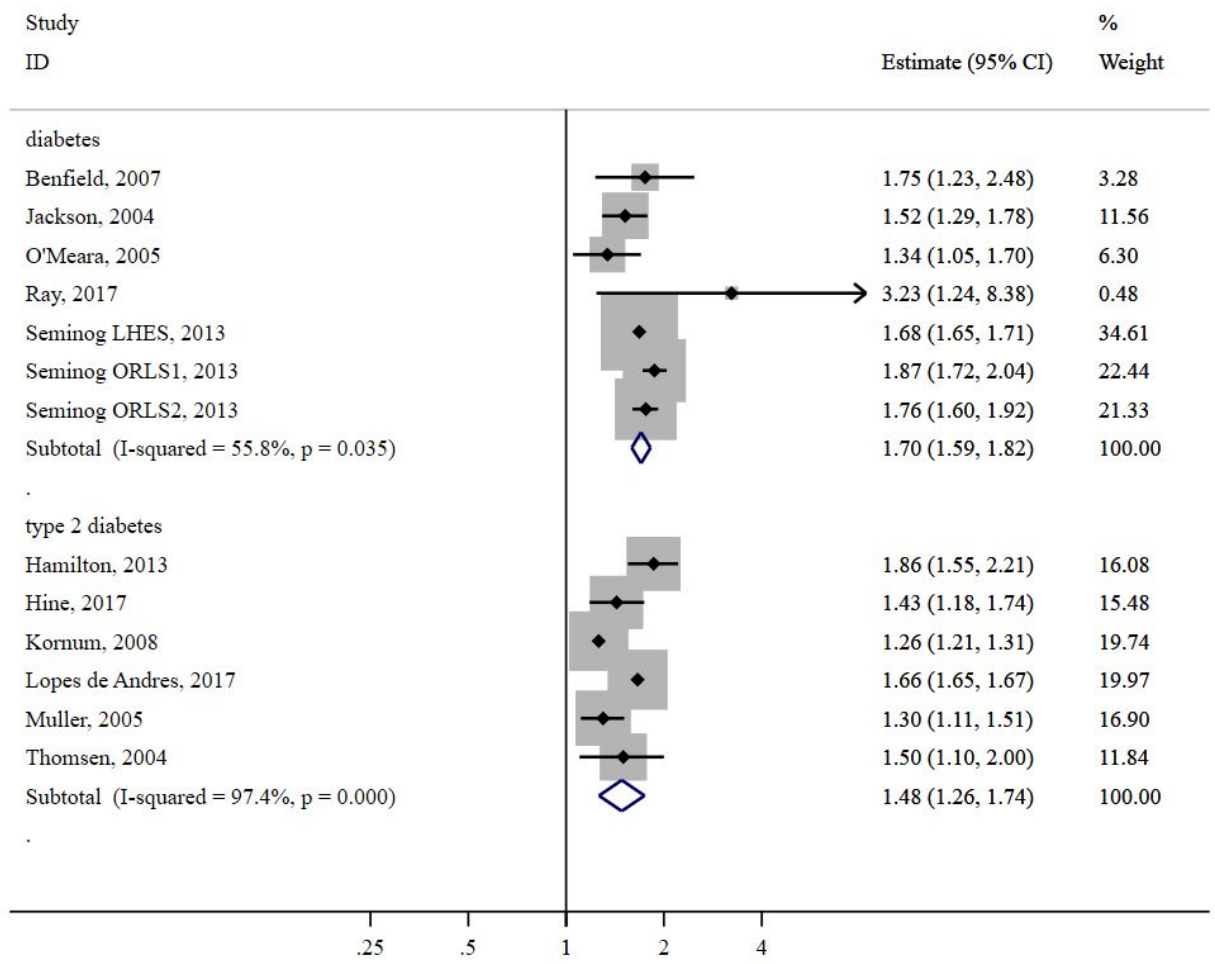

e-Figure 2: Forest plot of association between type 2 diabetes and risk of community-acquired pneumonia by outcome definition

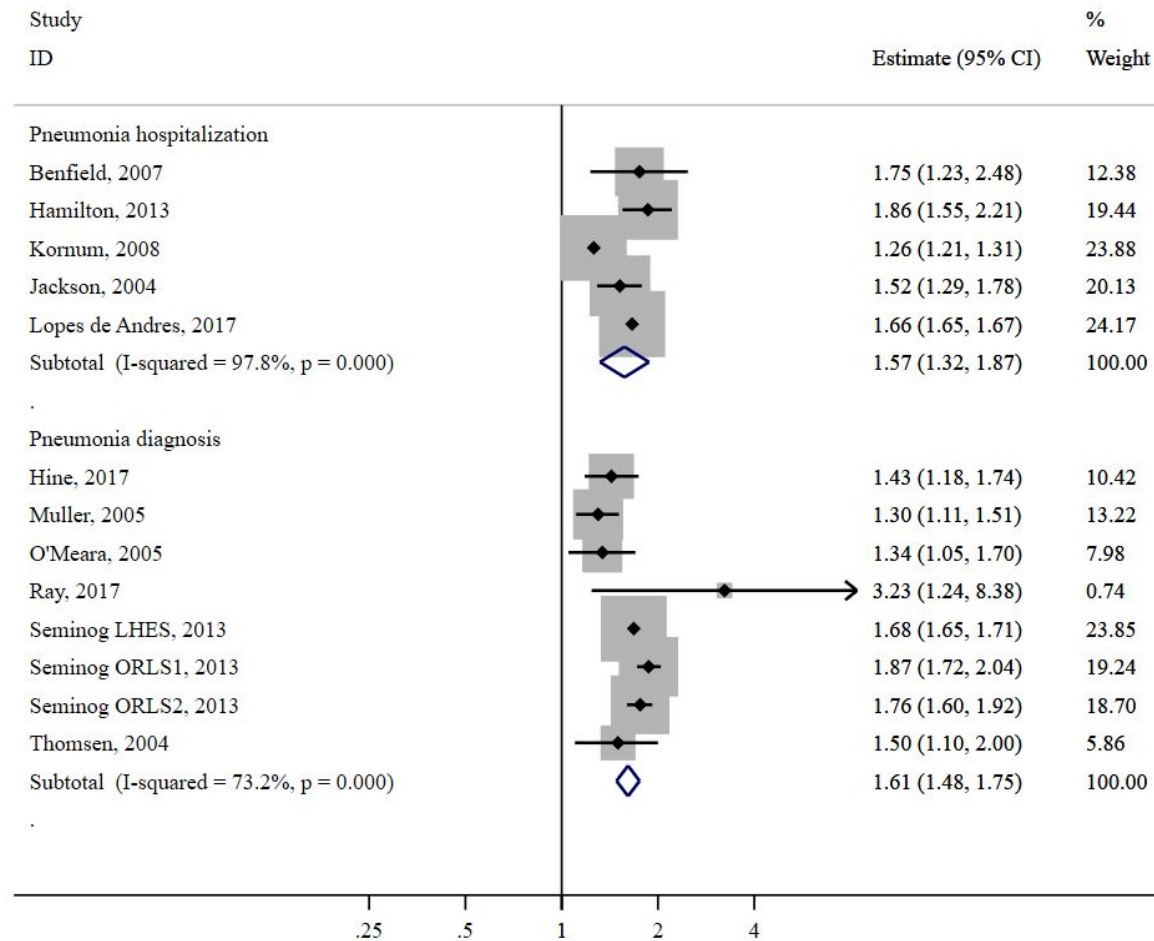

1  
2  
3  
4  
5  
6  
7  
8  
9  
10  
11  
12  
13  
14  
15  
16  
17  
18  
19  
20  
21  
22  
23  
24  
25  
26  
27  
28  
29  
30  
31  
32  
33  
34  
35  
36  
37  
38  
39  
40  
41  
42  
43  
44  
45  
46  
47

e-Figure 3: Influence analysis

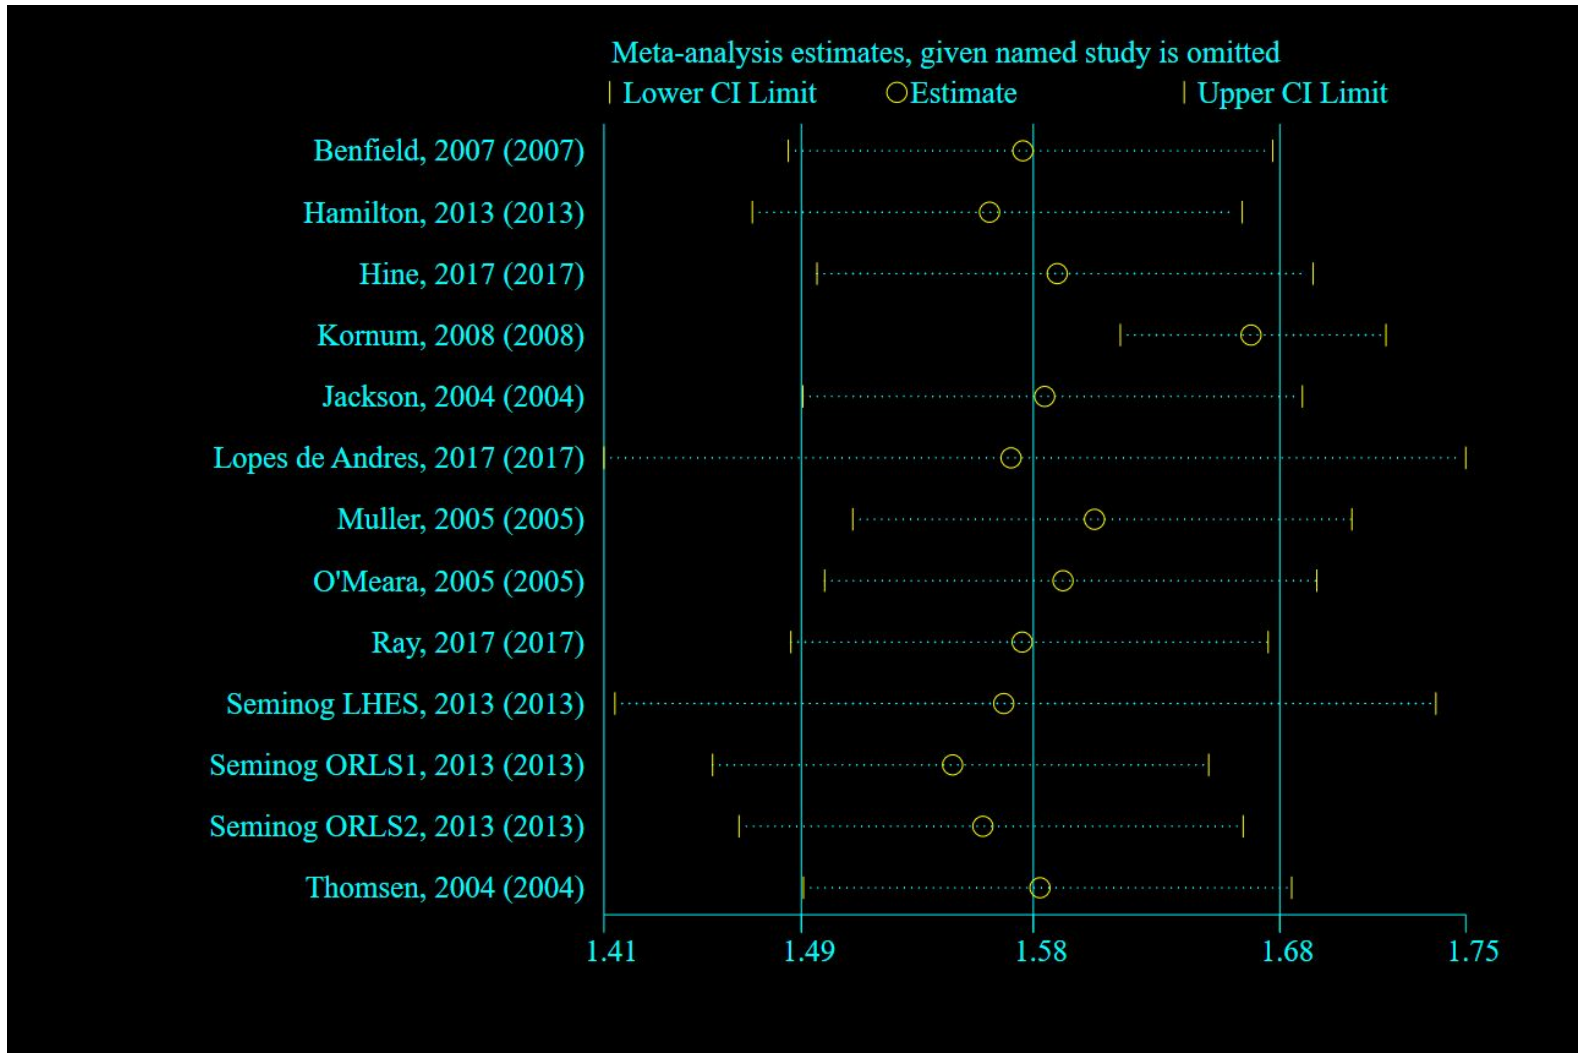

**e-Figure 4: Forest plot of association between type 2 diabetes and risk of community-acquired pneumonia excluding study by Kornum et al. (2008)**

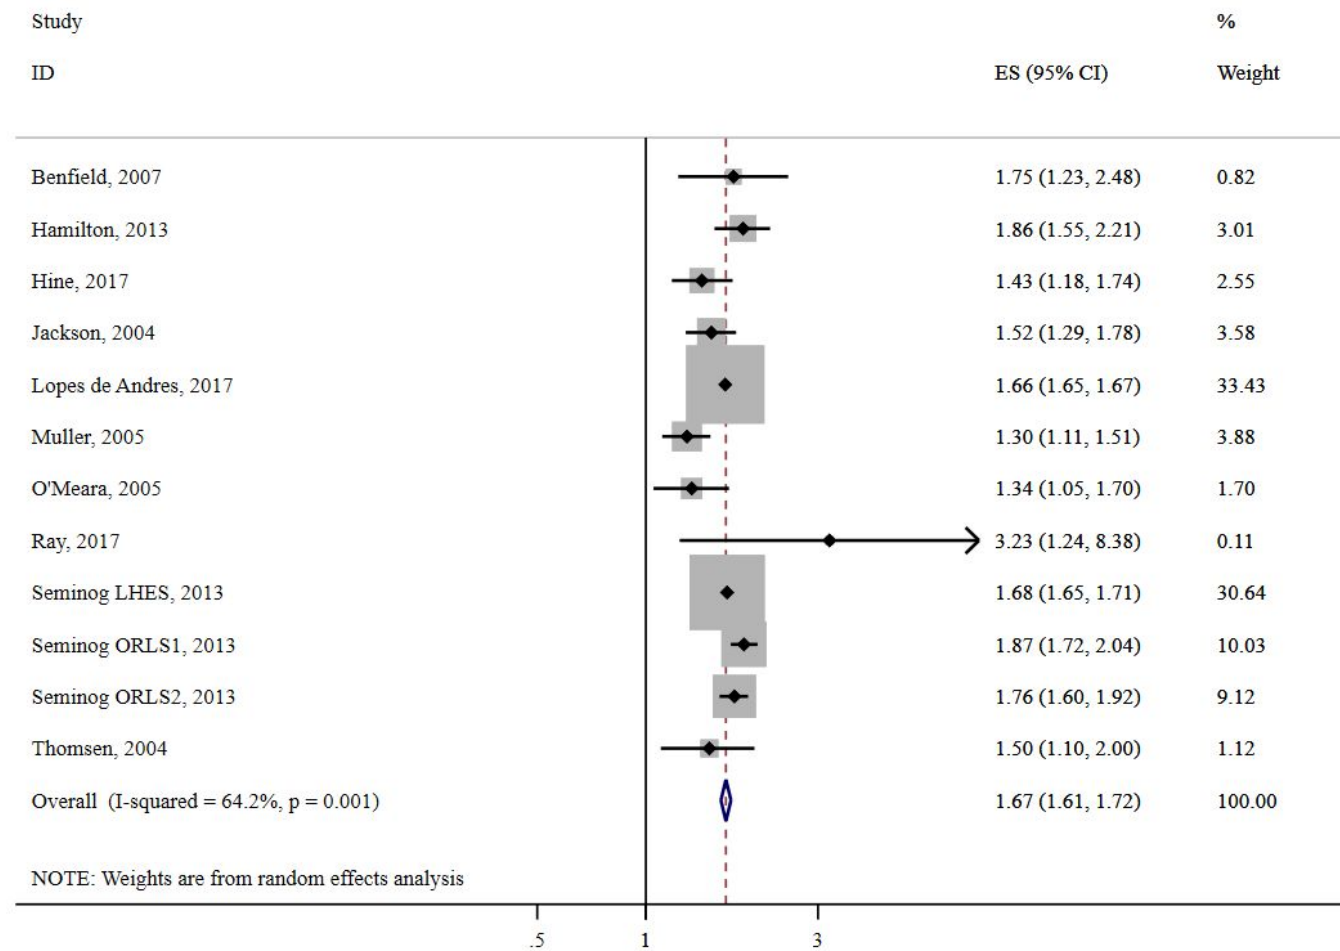

1  
2  
3  
4  
5  
6  
7  
8  
9  
10  
11  
12  
13  
14  
15  
16  
17  
18  
19  
20  
21  
22  
23  
24  
25  
26  
27  
28  
29  
30  
31  
32  
33  
34  
35  
36  
37  
38  
39  
40  
41  
42  
43  
44  
45  
46  
47

**e-Figure 5: Funnel plot for assessment of publication bias of included studies on type 2 diabetes and community-acquired pneumonia**

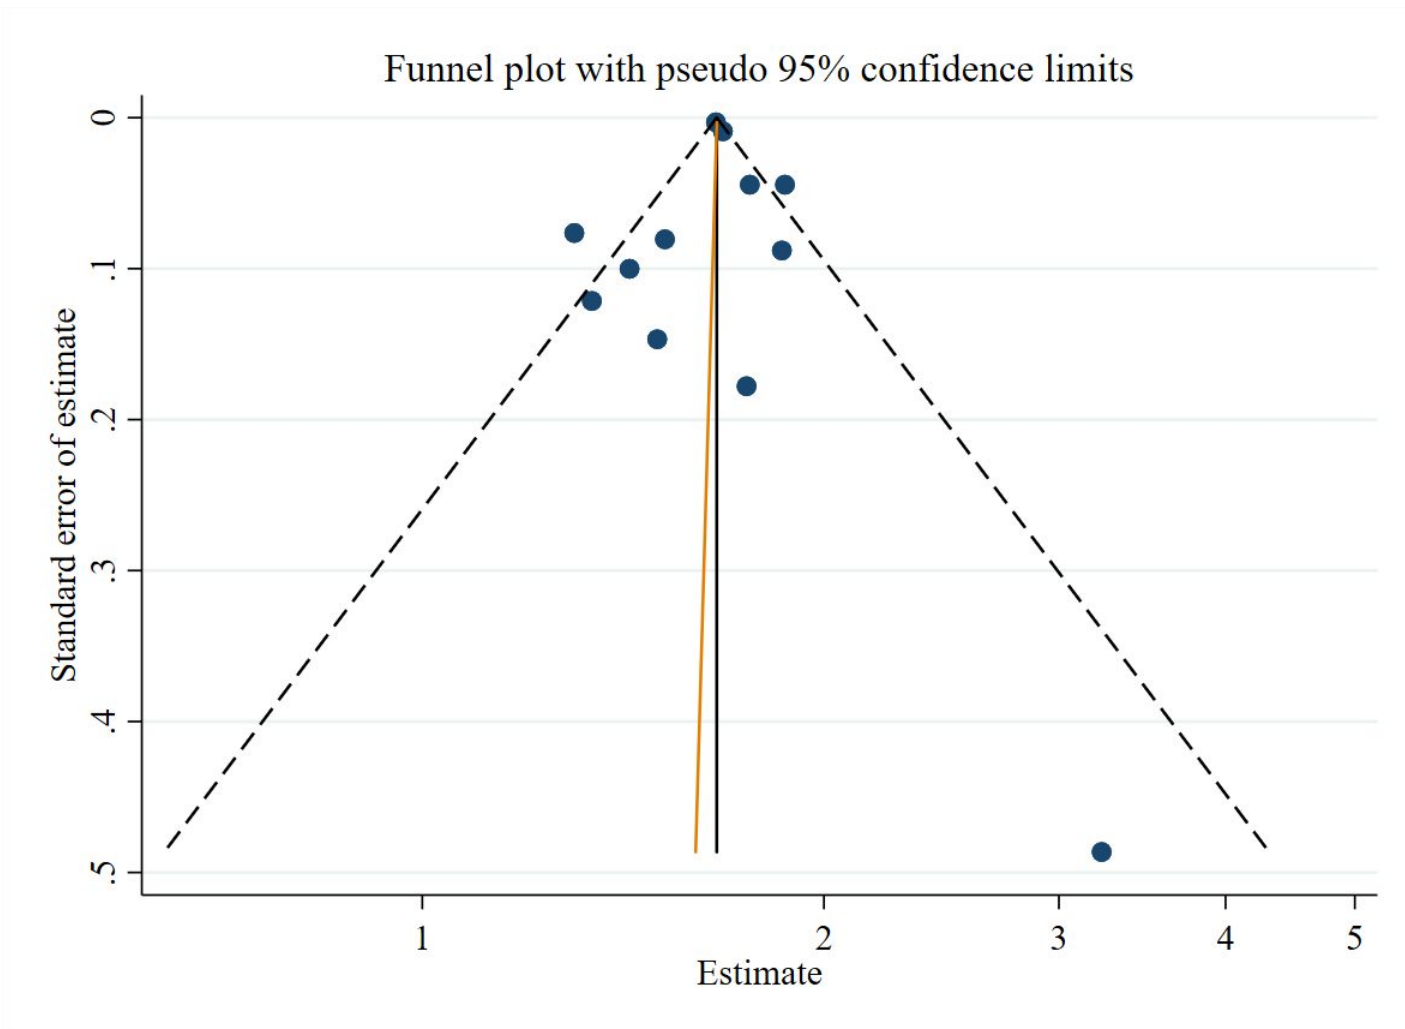

## Type 2 Diabetes Mellitus and Risk of Community-acquired Pneumonia: A Systematic Review and Meta-analysis of Observational Studies

Preferred Reporting Items for Systematic review and Meta-Analysis Protocols (PRISMA-P) 2015 checklist

| Section/topic             | #  | Checklist item                                                                                                                                                                                                                                                                                              | Reported on page # |
|---------------------------|----|-------------------------------------------------------------------------------------------------------------------------------------------------------------------------------------------------------------------------------------------------------------------------------------------------------------|--------------------|
| <b>TITLE</b>              |    |                                                                                                                                                                                                                                                                                                             |                    |
| Title                     | 1  | Identify the report as a systematic review, meta-analysis, or both.                                                                                                                                                                                                                                         | 1                  |
| <b>ABSTRACT</b>           |    |                                                                                                                                                                                                                                                                                                             |                    |
| Structured summary        | 2  | Provide a structured summary including, as applicable: background; objectives; data sources; study eligibility criteria, participants, and interventions; study appraisal and synthesis methods; results; limitations; conclusions and implications of key findings; systematic review registration number. | 2                  |
| <b>INTRODUCTION</b>       |    |                                                                                                                                                                                                                                                                                                             |                    |
| Rationale                 | 3  | Describe the rationale for the review in the context of what is already known.                                                                                                                                                                                                                              | 3                  |
| Objectives                | 4  | Provide an explicit statement of questions being addressed with reference to participants, interventions, comparisons, outcomes, and study design (PICOS).                                                                                                                                                  | 3                  |
| <b>METHODS</b>            |    |                                                                                                                                                                                                                                                                                                             |                    |
| Protocol and registration | 5  | Indicate if a review protocol exists, if and where it can be accessed (e.g., Web address), and, if available, provide registration information including registration number.                                                                                                                               | 4                  |
| Eligibility criteria      | 6  | Specify study characteristics (e.g., PICOS, length of follow-up) and report characteristics (e.g., years considered, language, publication status) used as criteria for eligibility, giving rationale.                                                                                                      | 4-5                |
| Information sources       | 7  | Describe all information sources (e.g., databases with dates of coverage, contact with study authors to identify additional studies) in the search and date last searched.                                                                                                                                  | 4                  |
| Search                    | 8  | Present full electronic search strategy for at least one database, including any limits used, such that it could be repeated.                                                                                                                                                                               | e-Table 1          |
| Study selection           | 9  | State the process for selecting studies (i.e., screening, eligibility, included in systematic review, and, if applicable, included in the meta-analysis).                                                                                                                                                   | 4-5                |
| Data collection process   | 10 | Describe method of data extraction from reports (e.g., piloted forms, independently, in duplicate) and any processes for obtaining and confirming data from investigators.                                                                                                                                  | 5                  |

1  
2  
3  
4  
5  
6  
7  
8  
9  
10  
11  
12  
13  
14  
15  
16  
17  
18  
19  
20  
21  
22  
23  
24  
25  
26  
27  
28  
29  
30  
31  
32  
33  
34  
35  
36  
37  
38  
39  
40  
41  
42  
43  
44  
45  
46  
47

|                                    |    |                                                                                                                                                                                                                        |                                                           |
|------------------------------------|----|------------------------------------------------------------------------------------------------------------------------------------------------------------------------------------------------------------------------|-----------------------------------------------------------|
| Data items                         | 11 | List and define all variables for which data were sought (e.g., PICOS, funding sources) and any assumptions and simplifications made.                                                                                  | 5                                                         |
| Risk of bias in individual studies | 12 | Describe methods used for assessing risk of bias of individual studies (including specification of whether this was done at the study or outcome level), and how this information is to be used in any data synthesis. | 5-6                                                       |
| Summary measures                   | 13 | State the principal summary measures (e.g., risk ratio, difference in means).                                                                                                                                          | 5                                                         |
| Synthesis of results               | 14 | Describe the methods of handling data and combining results of studies, if done, including measures of consistency (e.g., $I^2$ ) for each meta-analysis.                                                              | 6                                                         |
| Section/topic                      | #  | Checklist item                                                                                                                                                                                                         | Reported on page #                                        |
| Risk of bias across studies        | 15 | Specify any assessment of risk of bias that may affect the cumulative evidence (e.g., publication bias, selective reporting within studies).                                                                           | 5-6                                                       |
| Additional analyses                | 16 | Describe methods of additional analyses (e.g., sensitivity or subgroup analyses, meta-regression), if done, indicating which were pre-specified.                                                                       | 6                                                         |
| <b>RESULTS</b>                     |    |                                                                                                                                                                                                                        |                                                           |
| Study selection                    | 17 | Give numbers of studies screened, assessed for eligibility, and included in the review, with reasons for exclusions at each stage, ideally with a flow diagram.                                                        | 7<br>Figure 1                                             |
| Study characteristics              | 18 | For each study, present characteristics for which data were extracted (e.g., study size, PICOS, follow-up period) and provide the citations.                                                                           | 7<br>Table 1                                              |
| Risk of bias within studies        | 19 | Present data on risk of bias of each study and, if available, any outcome level assessment (see item 12).                                                                                                              | 8<br>e-Table 3                                            |
| Results of individual studies      | 20 | For all outcomes considered (benefits or harms), present, for each study: (a) simple summary data for each intervention group (b) effect estimates and confidence intervals, ideally with a forest plot.               | 8-9<br>Table 2<br>Figure 2                                |
| Synthesis of results               | 21 | Present results of each meta-analysis done, including confidence intervals and measures of consistency.                                                                                                                | 8-9<br>Figure 2<br>e-Figure 1<br>e-Figure 2<br>e-Figure 3 |



|                             |    |                                                                                                                                                                                      |                                                             |
|-----------------------------|----|--------------------------------------------------------------------------------------------------------------------------------------------------------------------------------------|-------------------------------------------------------------|
| Risk of bias across studies | 22 | Present results of any assessment of risk of bias across studies (see Item 15).                                                                                                      | 8<br>e-Table 3<br>e-Figure-5                                |
| Additional analysis         | 23 | Give results of additional analyses, if done (e.g., sensitivity or subgroup analyses, meta-regression [see Item 16]).                                                                | 8-9<br>e-Figure 1<br>e-Figure 2<br>e-Figure 3<br>e-Figure 4 |
| <b>DISCUSSION</b>           |    |                                                                                                                                                                                      |                                                             |
| Summary of evidence         | 24 | Summarize the main findings including the strength of evidence for each main outcome; consider their relevance to key groups (e.g., healthcare providers, users, and policy makers). | 10                                                          |
| Limitations                 | 25 | Discuss limitations at study and outcome level (e.g., risk of bias), and at review-level (e.g., incomplete retrieval of identified research, reporting bias).                        | 12                                                          |
| Conclusions                 | 26 | Provide a general interpretation of the results in the context of other evidence, and implications for future research.                                                              | 13                                                          |
| <b>FUNDING</b>              |    |                                                                                                                                                                                      |                                                             |
| Funding                     | 27 | Describe sources of funding for the systematic review and other support (e.g., supply of data); role of funders for the systematic review.                                           | 14                                                          |
